# Supplementary material for: Repression of Abd-B by Polycomb is critical for cell identity maintenance in adult Drosophila testis
Source: PubMed Central journal article supplement (PMC5506049; doi:10.1038/s41598-017-05359-0), 2017-07-11
Supplement: 41598_2017_5359_MOESM1_ESM.pdf [file 41598_2017_5359_MOESM1_ESM.pdf]

1 **Repression of Abd-B by Polycomb is critical for cell identity maintenance in**  
2 **adult *Drosophila* testis**

3

4 Shuo Zhang<sup>1</sup>, Chenyu Pan<sup>1</sup>, Xiangdong Lv<sup>1</sup>, Wei Wu<sup>1</sup>, Hao Chen<sup>1</sup>, Wenqing Wu<sup>1</sup>,  
5 Hailong Wu<sup>1</sup>, Lei Zhang<sup>1</sup>, Yun Zhao<sup>1,2\*</sup>

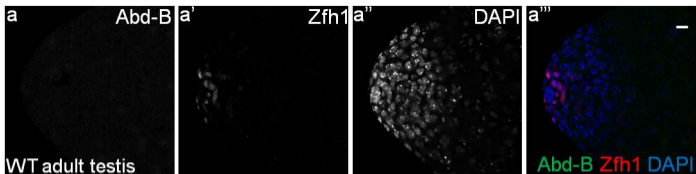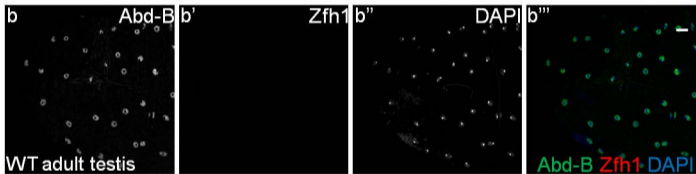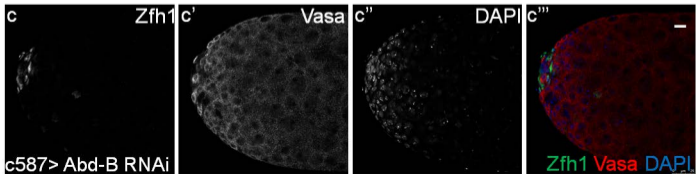

**Supplementary Fig. 1 Abd-B is generally repressed in CySCs of adult testis, and only locates in the sheath cells.**

(a-a'') Confocal pictures of the wild type adult testis with Abd-B (green), Zfh1 (red) and DAPI (blue). The Zfh1 positive cells locate around the hub, which is indicated by the compact staining of DAPI in the apex of testis.

(b-b'') Confocal pictures of the sheath cells in wild type adult testis with Abd-B (green), Zfh1 (red) and DAPI (blue).

(c-c'') Confocal pictures of the representative testis after the Abd-B RNAi induction in CySCs for 15 days at 29°C. Zfh1 (green), Vasa (red) and DAPI (blue).

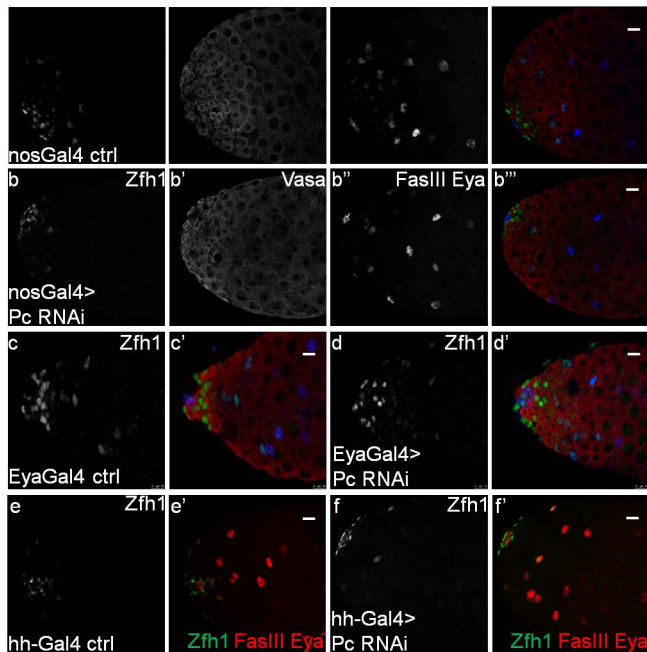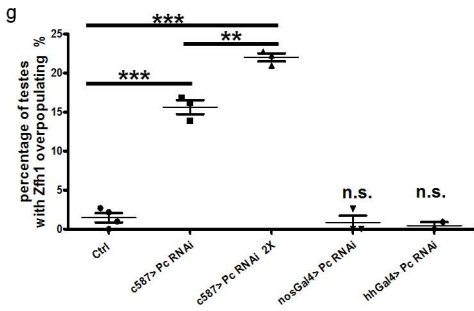

**Supplementary Fig. 2 There is no obvious dysfunction when Pc is knocked down in *Drosophila* germline cells, late cyst cells or hub cells.**

(a-d') Representative testes with Zfh1 (green), Vasa (red) FasIII and Eya (blue) after RNAi induction for 21 days in 29°C. (a-a''') nosGal4 control, (b-b''') nosGal4> Pc RNAi, specifically knocking down Pc in germline stem cells. (c-c') eyaGal4 control, (d-d') eyaGal4> Pc RNAi, specifically knocking down Pc in late cyst cells.

(e-f') Representative testes showing Zfh1 (green), FasIII and Eya (red) after RNAi induction for 21 days in 29°C using the hub cell specific driver, hhGal4. (e-e') hh-Gal4 control, (f-f') hh-Gal4> Pc RNAi.

(g) Quantification of percentage of testes with Zfh1 positive cell overpopulating (the number of Zfh1 positive cells is over 60) in c587 ctrl, c587>Pc RNAi, c587>Pc RNAi(2X), nosGal4> Pc RNAi or hhGal4> Pc RNAi after RNAi induction in 29°C for 21days, respectively. Data are presented as mean  $\pm$  SEM. Statistical significance is determined by Student's t-test, \*\*\*P<0.001, \*\*P<0.01, n.s., not significant.

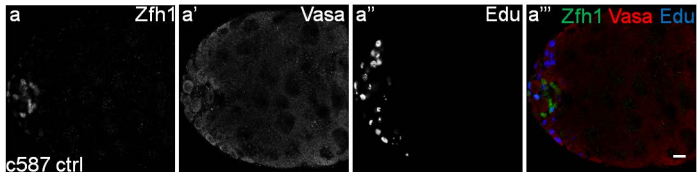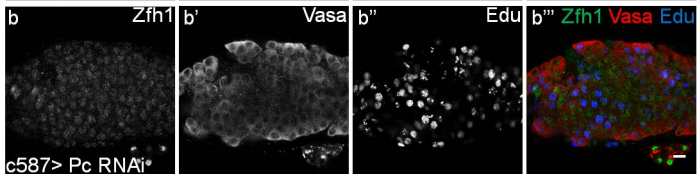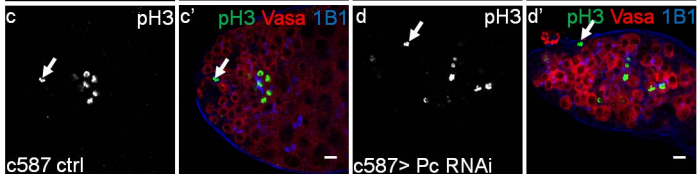

**Supplementary Fig. 3 Loss-of-function of Pc in CySCs leads to a much more active cell proliferation.**

(a-b''') Edu incorporation assay in adult *Drosophila* testis after RNAi induction for 21 days at 29°C. Representative testes showing Zfh1 (green), Vasa (red), Edu (blue). (a-a''') c587 control, (b-b''') c587> Pc RNAi.

(c-d') Representative testes showing mitotic marker pH3 (green), germline cell marker Vasa (red) and spectrosome marker 1B1 (blue) after RNAi induction in 29°C for 21 days. (c-c') c587 control, (d-d') c587> Pc RNAi. White arrows indicate dividing CySCs.

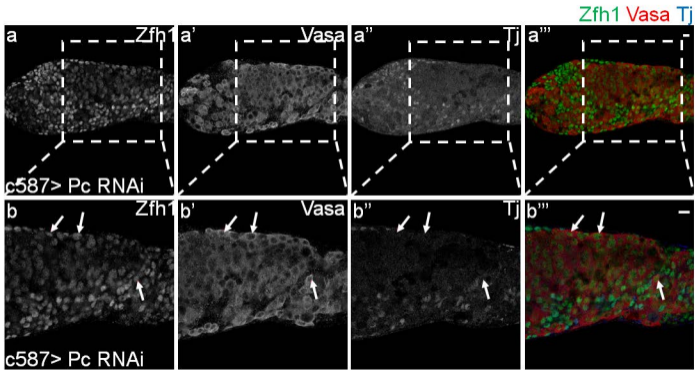



**Supplementary Fig. 4 Some overpopulated Zfh1 positive cells do not express Tj.**

Representative testes showing the Zfh1(green), Vasa (red) and the early cyst cell marker Tj (blue) after RNAi induction at 29°C for 21 days. (a-a'') c587 control, (b-b'') c587> Pc RNAi. The white arrows indicate cells with both Zfh1 and Vasa signals, but not Tj.

Zfh1 Vasa Abd-B

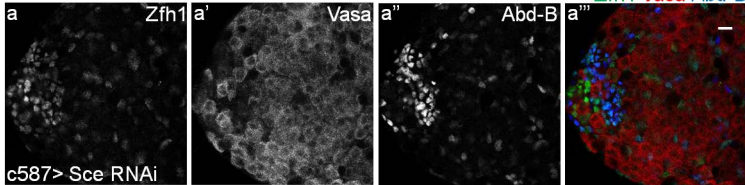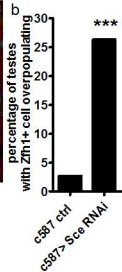

**Supplementary Fig. 5 Knockdown of Sce in CySCs also leads to an upregulation of Abd-B and Zfh1, which is similar with Pc RNAi.**

(a-a''') Representative testis of c587> Sce RNAi showing Zfh1 (green), Vasa (red) and Abd-B (blue) after RNAi induction for 21 days at 29°C.

(b) Quantification of fraction of testes with Zfh1 positive cells overpopulating. The number of testes is more than 60 testes for each genotype. Statistical significance is determined by Student's t-test, \*\*\*P<0.001.

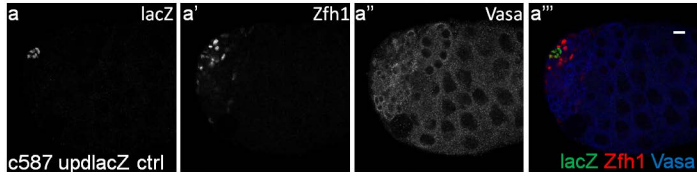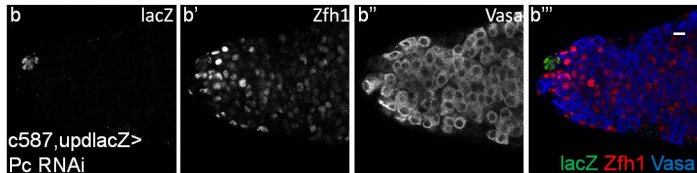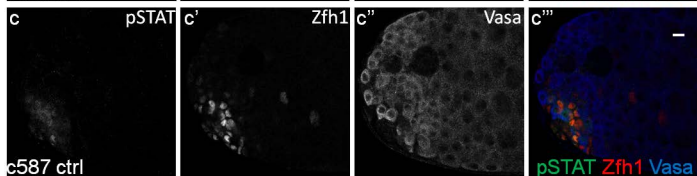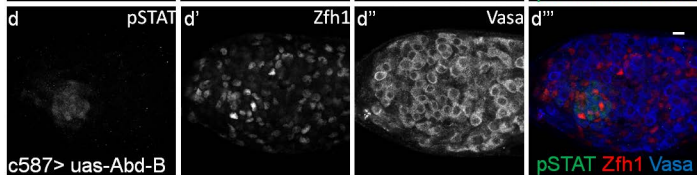

**Supplementary Fig. 6 The activity of JAK-STAT pathway is not affected by the Pc RNAi or Abd-B overexpression in CySCs.**

(a-b''') Representative testes showing the lacZ (green), Zfh1 (red) and Vasa (blue) after RNAi induction at 29°C for 21 days. The upd-lacZ indicates the mRNA level of Unpaired (Upd). (a-a''') c587 control, (b-b''') c587 > Pc RNAi.

(c-d''') Representative testes showing the pSTAT (green), Zfh1 (red) and Vasa (blue). Phosphorylated STAT (pSTAT) is the activated downstream transcription factor of JAK-STAT signal pathway. (a-a''') c587 control and (b-b''') c587 > uas-Abd-B.

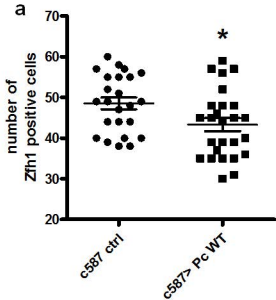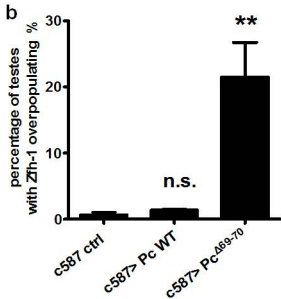

**Supplementary Fig. 7 Quantifications of the Zfh1 positive cells and the penetrance of testes with Zfh1 overpopulating when Pc<sup>WT</sup> or Pc<sup>Δ69-70</sup> was overexpressed in CySCs.**

(a) the quantification of the number of Zfh1 positive cells in c587 control and c587> uas-Pc<sup>WT</sup>. Statistical significance is determined by Student's t-test. \*P<0.1.

(b) the quantification of the penetrance of testes with Zfh1 positive cells overpopulation in c587 control, c587> uas-Pc<sup>WT</sup> and c587> uas- Pc<sup>Δ69-70</sup>. We counted at least 60 testes for each genotype. Statistical significance is determined by Student's t-test. n.s., not significant, \*\*P<0.01.

**CySC**

**GSC**

H3K27me3

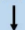

Pc

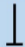

Abd-B

cell identity

self-renewal

proliferation

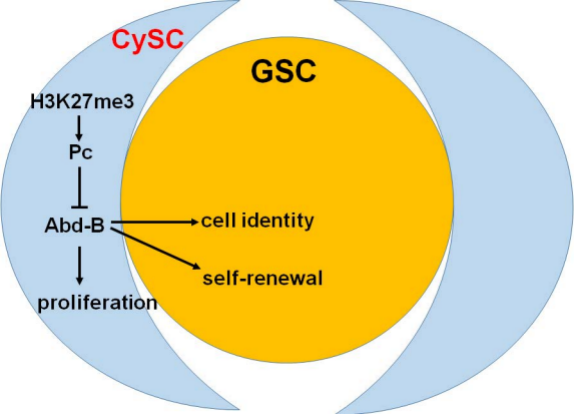



**Supplementary Fig. 8 A model for the function of canonical Pc and Abd-B in the testis homeostasis maintenance.**

In CySCs of wild-type testes, Pc is recruited by the H3K27me3, and represses the expression of Abd-B to keep the differentiation of CySCs autonomously. When Pc was knocked down in CySCs, Abd-B is derepressed, resulting in the ectopic proliferation of CySCs, the delay of germline cell differentiation and the germline cell identity mistake.
